# Supplementary material
Source: MDPI journal article supplement (https://www.mdpi.com/2624-8549/5/3/126)
Supplement: s1 [file s1]

## Supporting Information

### Tris(3-nitro-pentane-2,4-dionato- $\kappa^2$ O,O') complexes as a new type of highly energetic materials: theoretical and experimental considerations.

Danijela S. Kretić, Ivana S. Veljković and Dušan Ž. Veljković

#### 1. Theoretical IR spectra

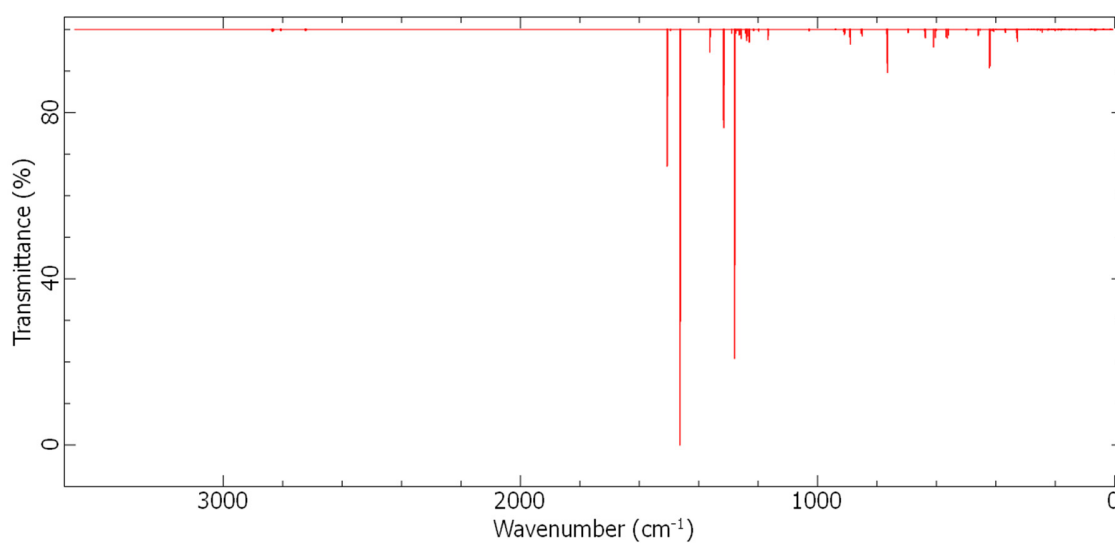

**Figure S1.** Theoretical IR spectrum of  $\text{Cr}(\text{AcAc}-\text{NO}_2)_3$

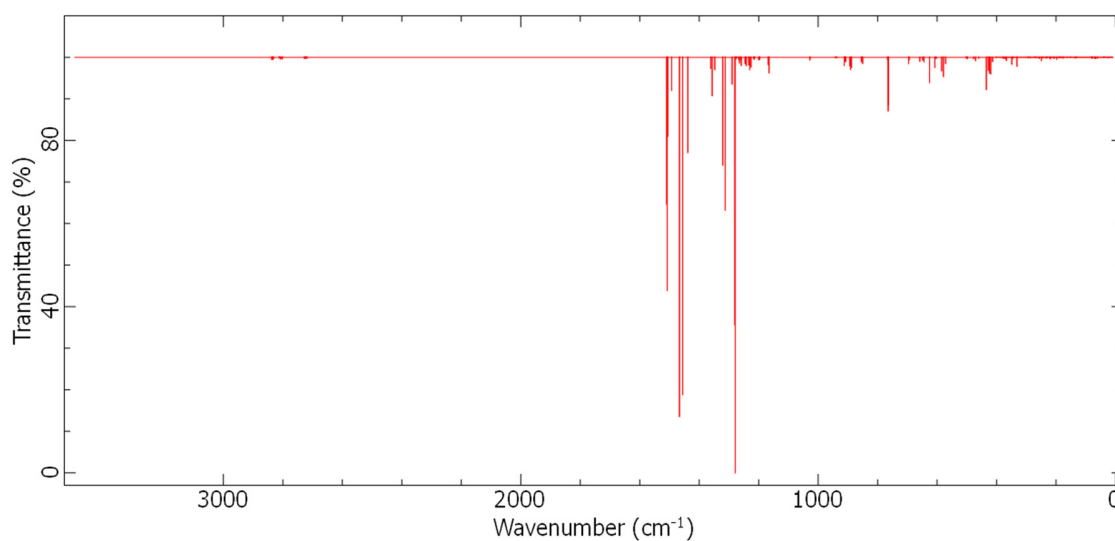

**Figure S2.** Theoretical IR spectrum of  $\text{Mn}(\text{AcAc}-\text{NO}_2)_3$

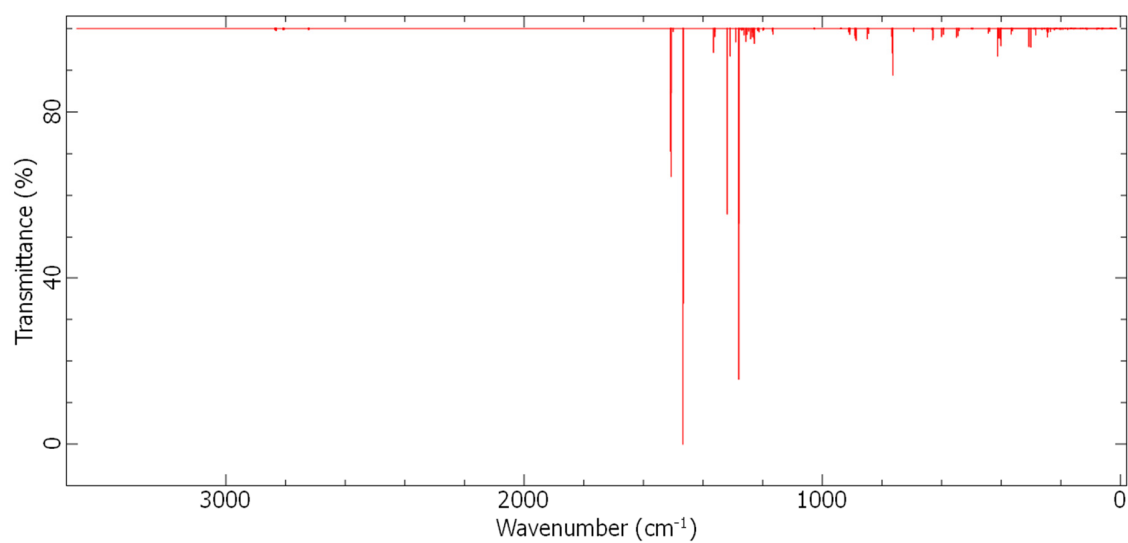

**Figure S3.** Theoretical IR spectrum of  $\text{Fe}(\text{AcAc}-\text{NO}_2)_3$

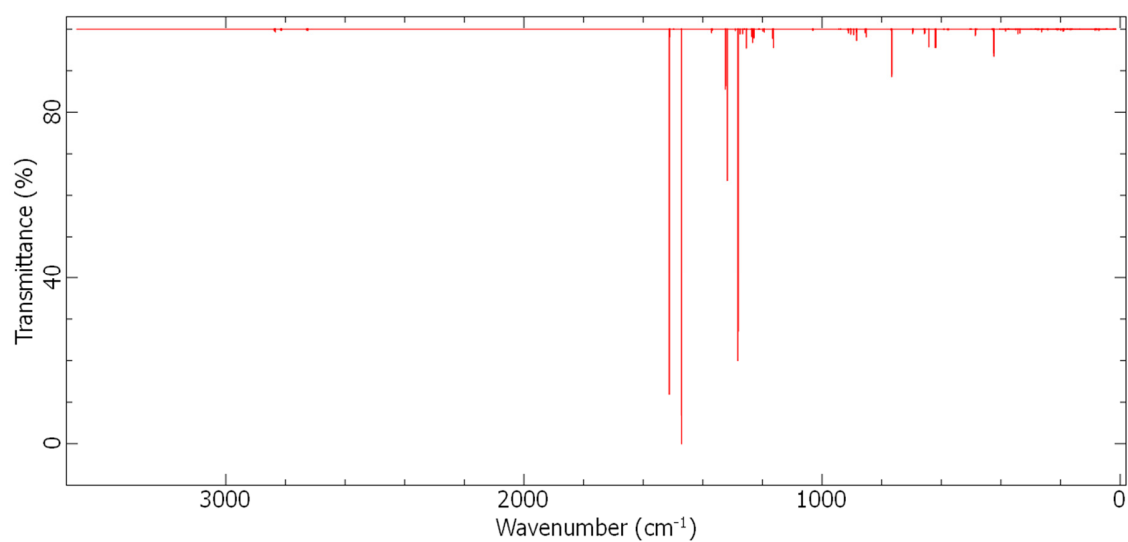

**Figure S4.** Theoretical IR spectrum of  $\text{Co}(\text{AcAc}-\text{NO}_2)_3$

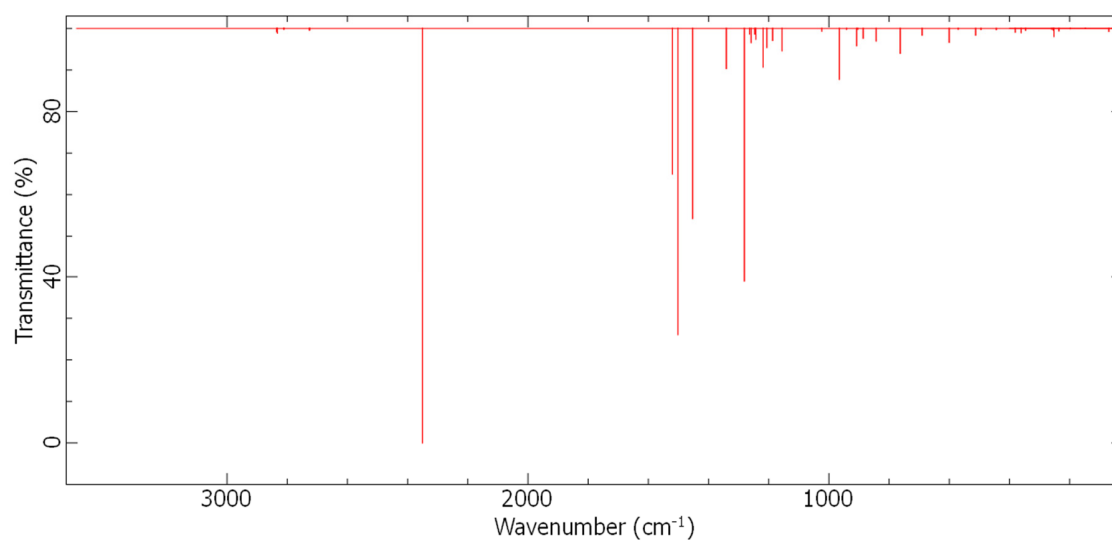

**Figure S5.** Theoretical IR spectrum of nitroacetylacetone

## 2. Hirshfeld map and fingerprint plot

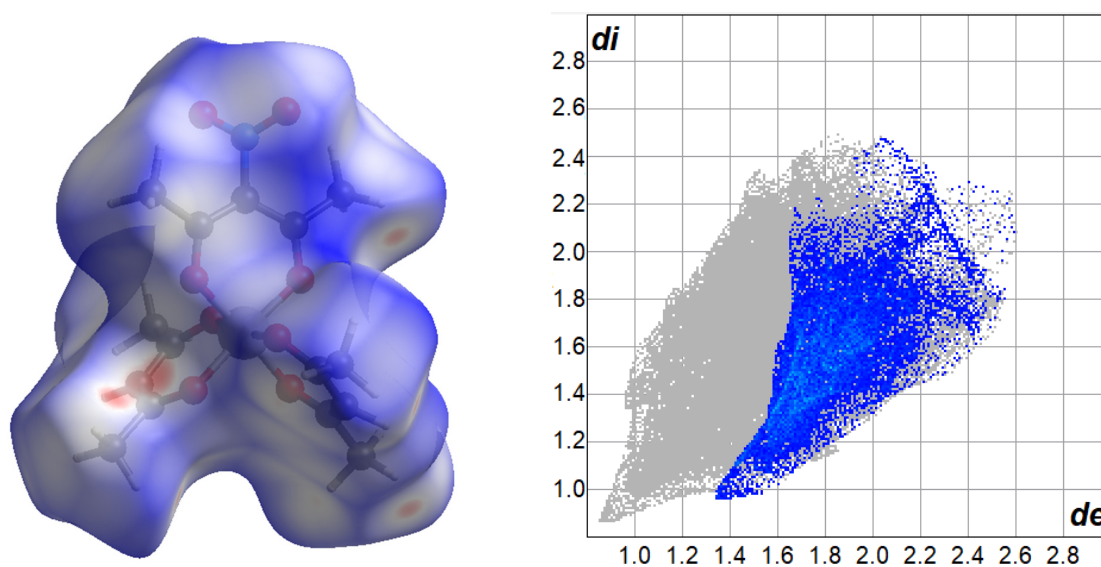

**Figure S6.** Hirshfeld surface mapped with  $d_{\text{norm}}$  (left) and filtered 2-D fingerprint plot showing O···H interactions (right) calculated and visualized for KUCAM crystal structure. The blue area in the filtered 2-D fingerprint plot indicate existence of O···H interactions in KUCAM crystal structure.

### 3. Cartesian (xyz) coordinates

**Table S1.** Cartesian coordinates for Cr(AcAc–NO<sub>2</sub>)<sub>3</sub> complex

|    |               |               |               |
|----|---------------|---------------|---------------|
| Cr | 0.0581430000  | -0.2118650000 | 0.0566640000  |
| O  | -0.7844780000 | -1.6900230000 | 1.0088140000  |
| O  | -1.4332710000 | -0.2822850000 | -1.2053100000 |
| O  | 1.1140920000  | -1.4616460000 | -1.0052840000 |
| O  | 0.8399100000  | 1.2916300000  | -0.9050310000 |
| O  | 1.5444990000  | -0.1670030000 | 1.3159330000  |
| O  | -0.9691630000 | 1.0793570000  | 1.0999290000  |
| C  | -1.9440040000 | -2.1878080000 | 0.9195460000  |
| C  | -2.8686130000 | -1.7754190000 | -0.0811990000 |
| C  | -2.5547130000 | -0.8645980000 | -1.1278060000 |
| C  | -2.2613930000 | -3.2162300000 | 1.9557220000  |
| C  | -3.4902300000 | -0.5594880000 | -2.2530550000 |
| C  | 2.7537210000  | -0.5129760000 | 1.1757620000  |
| C  | 3.2112250000  | -1.2285530000 | 0.0345050000  |
| C  | 3.6385330000  | -0.1622710000 | 2.3281810000  |
| C  | 2.3522710000  | -1.7218330000 | -0.9863350000 |
| C  | 2.8281870000  | -2.5669470000 | -2.1225780000 |
| C  | 0.5799750000  | 2.5301560000  | -0.8784840000 |
| C  | -0.3717240000 | 3.0867620000  | 0.0206260000  |
| C  | -1.0871820000 | 2.3354670000  | 0.9945740000  |
| C  | -2.0568640000 | 2.9495480000  | 1.9512620000  |
| C  | 1.3868520000  | 3.3538610000  | -1.8288670000 |

|   |               |               |               |
|---|---------------|---------------|---------------|
| H | -1.5035170000 | -3.1444060000 | 2.7449310000  |
| H | -3.2709830000 | -3.0965400000 | 2.3698830000  |
| H | -2.2354440000 | -4.2185290000 | 1.5039680000  |
| H | -4.0865550000 | -1.4247970000 | -2.5676030000 |
| H | -4.2061220000 | 0.2110140000  | -1.9299450000 |
| H | -2.8944280000 | -0.1697440000 | -3.0876670000 |
| H | 2.9984250000  | 0.0091730000  | 3.2024230000  |
| H | 4.3957270000  | -0.9271900000 | 2.5404420000  |
| H | 4.1864610000  | 0.7630840000  | 2.0954710000  |
| H | 3.7730380000  | -2.2035100000 | -2.5472450000 |
| H | 3.0246750000  | -3.5900740000 | -1.7708300000 |
| H | 2.0394530000  | -2.5826420000 | -2.8841710000 |
| H | -1.5078450000 | 3.4354920000  | 2.7712430000  |
| H | -2.6696480000 | 3.7331190000  | 1.4879040000  |
| H | -2.6859280000 | 2.1478000000  | 2.3564930000  |
| H | 1.6979120000  | 4.3170590000  | -1.4050990000 |
| H | 2.2576710000  | 2.7602340000  | -2.1331550000 |
| H | 0.7784890000  | 3.5877540000  | -2.7151580000 |
| N | -4.2045730000 | -2.3565940000 | -0.0724340000 |
| N | -0.5961810000 | 4.5261640000  | -0.0370880000 |
| N | 4.6351710000  | -1.5233450000 | -0.0484260000 |
| O | -0.7829040000 | 5.1221770000  | 1.0105700000  |
| O | -0.5857740000 | 5.0601140000  | -1.1337150000 |
| O | 4.9821230000  | -2.6006710000 | -0.5030310000 |
| O | 5.4106200000  | -0.6662150000 | 0.3428470000  |

|   |               |               |               |
|---|---------------|---------------|---------------|
| O | -4.3288350000 | -3.5230260000 | 0.2619670000  |
| O | -5.1348170000 | -1.6379270000 | -0.3998530000 |

**Table S2.** Cartesian coordinates for Mn(AcAc–NO<sub>2</sub>)<sub>3</sub> complex

|    |               |               |               |
|----|---------------|---------------|---------------|
| Mn | -0.1821910000 | -0.2287710000 | 0.0643710000  |
| O  | -1.5816100000 | -0.0585530000 | 1.3858350000  |
| O  | -1.3769460000 | -1.1904150000 | -1.0873810000 |
| O  | 1.2226840000  | -0.3887720000 | -1.2553110000 |
| O  | 0.3884880000  | -1.8755960000 | 0.8733370000  |
| O  | 1.0321080000  | 0.7346330000  | 1.1800390000  |
| O  | -0.7410010000 | 1.4094630000  | -0.7409820000 |
| C  | -3.6493600000 | 0.2236310000  | 2.4018960000  |
| C  | -2.8288610000 | -0.1748890000 | 1.2164910000  |
| C  | -3.4000350000 | -0.7008420000 | 0.0229410000  |
| C  | -2.6423970000 | -1.2508880000 | -1.0455600000 |
| C  | -3.2590090000 | -1.9347680000 | -2.2226110000 |
| C  | 3.2994390000  | -0.7511720000 | -2.2269100000 |
| C  | 2.3008630000  | -1.0438100000 | -1.1529730000 |
| C  | 2.5150090000  | -2.0181300000 | -0.1390320000 |
| C  | 1.5121910000  | -2.4514020000 | 0.7720460000  |
| C  | 1.6912580000  | -3.6121990000 | 1.6955410000  |
| C  | 2.5929270000  | 2.2589450000  | 1.9785130000  |
| C  | 1.4890470000  | 1.9084070000  | 1.0338650000  |
| C  | 0.9544600000  | 2.8190140000  | 0.0847470000  |
| C  | -0.1847910000 | 2.5476450000  | -0.7214370000 |

|   |               |               |               |
|---|---------------|---------------|---------------|
| C | -0.8180260000 | 3.5582300000  | -1.6214050000 |
| N | 1.5809710000  | 4.1315300000  | -0.0176530000 |
| O | 2.7958950000  | 4.1832180000  | 0.0769720000  |
| O | 0.8673290000  | 5.1038580000  | -0.1946670000 |
| N | 3.8233920000  | -2.6596910000 | -0.0915540000 |
| O | 3.8856390000  | -3.8477040000 | 0.1761460000  |
| O | 4.7970340000  | -1.9600250000 | -0.3177430000 |
| N | -4.8548110000 | -0.7403570000 | -0.0643500000 |
| O | -5.4720900000 | 0.2020160000  | 0.4039380000  |
| O | -5.3816750000 | -1.7012600000 | -0.5997450000 |
| H | -2.9964120000 | 0.2031240000  | 3.2832120000  |
| H | -4.0228390000 | 1.2479860000  | 2.2544380000  |
| H | -4.5309070000 | -0.4115810000 | 2.5515960000  |
| H | -3.6406570000 | -2.9219570000 | -1.9257990000 |
| H | -4.1213520000 | -1.3818870000 | -2.6177630000 |
| H | -2.4850010000 | -2.0480510000 | -2.9909820000 |
| H | 4.0234640000  | -0.0132510000 | -1.8485860000 |
| H | 3.8785640000  | -1.6285610000 | -2.5391320000 |
| H | 2.7592530000  | -0.3156960000 | -3.0767000000 |
| H | 0.8535840000  | -3.6147520000 | 2.4025980000  |
| H | 1.7119560000  | -4.5500930000 | 1.1231290000  |
| H | 2.6496600000  | -3.5652180000 | 2.2303130000  |
| H | 3.5592120000  | 2.1147180000  | 1.4710270000  |
| H | 2.5666580000  | 3.3041040000  | 2.3097860000  |
| H | 2.5346180000  | 1.5744390000  | 2.8338590000  |

|   |               |              |               |
|---|---------------|--------------|---------------|
| H | -1.5012970000 | 3.0288900000 | -2.2960920000 |
| H | -1.3777480000 | 4.2931980000 | -1.0255120000 |
| H | -0.0759600000 | 4.1299600000 | -2.1939440000 |

**Table S3.** Cartesian coordinates for Fe(AcAc –NO<sub>2</sub>)<sub>3</sub> complex

|    |               |               |               |
|----|---------------|---------------|---------------|
| Fe | 0.2155800000  | -0.2867990000 | 0.0866520000  |
| O  | -0.5436630000 | -1.9275740000 | 0.8904650000  |
| O  | -1.2498920000 | -0.5153770000 | -1.2680470000 |
| C  | -1.6889410000 | -2.4622230000 | 0.8195720000  |
| C  | -2.6372250000 | -2.0597520000 | -0.1611360000 |
| C  | -2.3481640000 | -1.1366750000 | -1.2087720000 |
| C  | -1.9583820000 | -3.5196780000 | 1.8400160000  |
| C  | -3.2859080000 | -0.8745250000 | -2.3439600000 |
| H  | -1.1843800000 | -3.4463630000 | 2.6132690000  |
| H  | -2.9610330000 | -3.4321070000 | 2.2787790000  |
| H  | -1.9209630000 | -4.5117140000 | 1.3669210000  |
| H  | -3.8634390000 | -1.7563490000 | -2.6472920000 |
| H  | -4.0178250000 | -0.1118390000 | -2.0379610000 |
| H  | -2.6942590000 | -0.4850100000 | -3.1817790000 |
| N  | -3.9601020000 | -2.6691320000 | -0.1454430000 |
| O  | -4.0612160000 | -3.8370990000 | 0.1908630000  |
| O  | -4.9047340000 | -1.9671150000 | -0.4679130000 |
| O  | 1.5417530000  | -1.1724490000 | -1.0908780000 |
| O  | 1.7118880000  | -0.2150570000 | 1.3948290000  |
| C  | 2.9653380000  | -0.2804710000 | 1.2457730000  |



|   |               |               |               |
|---|---------------|---------------|---------------|
| C | 3.5555390000  | -0.7057500000 | 0.0216070000  |
| C | 3.7647350000  | 0.0620290000  | 2.4618860000  |
| C | 2.8069850000  | -1.1898150000 | -1.0879150000 |
| C | 3.4363200000  | -1.7354890000 | -2.3282580000 |
| H | 3.1051340000  | -0.0361960000 | 3.3329780000  |
| H | 4.6658390000  | -0.5524370000 | 2.5778280000  |
| H | 4.1060020000  | 1.1054330000  | 2.3862340000  |
| H | 4.2856490000  | -1.1284930000 | -2.6683480000 |
| H | 3.8404120000  | -2.7391660000 | -2.1319740000 |
| H | 2.6615610000  | -1.7921270000 | -3.1021680000 |
| N | 5.0097880000  | -0.7020780000 | -0.0651250000 |
| O | 5.5582100000  | -1.6015530000 | -0.6796290000 |
| O | 5.6045690000  | 0.2111840000  | 0.4831590000  |
| O | 0.6779630000  | 1.4724530000  | -0.7497370000 |
| O | -0.9746670000 | 0.8208580000  | 1.2529230000  |
| C | 0.0856420000  | 2.5888380000  | -0.7612010000 |
| C | -1.0071050000 | 2.8710350000  | 0.1077070000  |
| C | -1.4616510000 | 1.9808750000  | 1.1215620000  |
| C | -2.5516530000 | 2.3246650000  | 2.0846690000  |
| C | 0.6552980000  | 3.5966540000  | -1.7069860000 |
| H | -2.1591260000 | 2.9938100000  | 2.8642650000  |
| H | -3.3803950000 | 2.8656600000  | 1.6098120000  |
| H | -2.9036660000 | 1.3925550000  | 2.5432460000  |
| H | 0.6330990000  | 4.6217990000  | -1.3176450000 |
| H | 1.6805800000  | 3.2890890000  | -1.9476250000 |

|   |               |              |               |
|---|---------------|--------------|---------------|
| H | 0.0560450000  | 3.6002160000 | -2.6299640000 |
| N | -1.6422470000 | 4.1770240000 | -0.0075630000 |
| O | -2.0137570000 | 4.7329000000 | 1.0126150000  |
| O | -1.7703740000 | 4.6464560000 | -1.1263980000 |

**Table S4.** Cartesian coordinates for Co(AcAc–NO<sub>2</sub>)<sub>3</sub> complex

|    |               |               |               |
|----|---------------|---------------|---------------|
| O  | 0.7185260000  | -1.3910660000 | -1.0908130000 |
| Co | -0.0001090000 | -0.0412450000 | -0.0001930000 |
| C  | 1.8717420000  | -1.9010050000 | -1.0059110000 |
| O  | 1.4809260000  | 0.0351750000  | 1.1530300000  |
| O  | 0.8546550000  | 1.2292450000  | -1.0907100000 |
| O  | -0.8524080000 | 1.2309820000  | 1.0902450000  |
| O  | -0.7212730000 | -1.3895840000 | 1.0905670000  |
| O  | -1.4811080000 | 0.0378660000  | -1.1533140000 |
| C  | 2.5519480000  | -0.6297490000 | 1.0591820000  |
| C  | 0.7568300000  | 2.4866070000  | -1.0083750000 |
| C  | -0.7518690000 | 2.4881390000  | 1.0080200000  |
| C  | -1.8755750000 | -1.8971060000 | 1.0060190000  |
| C  | -2.5534400000 | -0.6249150000 | -1.0592280000 |
| C  | 2.8016570000  | -1.5656060000 | 0.0174690000  |
| C  | 2.1502570000  | -2.9298540000 | -2.0563980000 |
| C  | 3.5506860000  | -0.3090450000 | 2.1266470000  |
| C  | 0.0032560000  | 3.1483030000  | -0.0000890000 |
| C  | 1.5486040000  | 3.2160500000  | -2.0479600000 |
| C  | -1.5420310000 | 3.2192290000  | 2.0476750000  |

|   |               |               |               |
|---|---------------|---------------|---------------|
| C | -2.8049520000 | -1.5600290000 | -0.0172980000 |
| C | -2.1560140000 | -2.9251720000 | 2.0567390000  |
| C | -3.5515670000 | -0.3025540000 | -2.1267680000 |
| N | -4.0974340000 | -2.2340340000 | -0.0034950000 |
| O | -4.6108240000 | -2.4629620000 | 1.0787460000  |
| O | -4.6004450000 | -2.5351220000 | -1.0726900000 |
| N | 4.0928060000  | -2.2422110000 | 0.0038740000  |
| O | 4.5950800000  | -2.5443190000 | 1.0731220000  |
| O | 4.6058180000  | -2.4722560000 | -1.0783100000 |
| N | 0.0049660000  | 4.6068400000  | 0.0001580000  |
| O | 0.0141680000  | 5.1792710000  | 1.0766190000  |
| O | -0.0027180000 | 5.1797160000  | -1.0760820000 |
| H | 1.1915630000  | -3.2275720000 | -2.4987800000 |
| H | 2.7921860000  | -2.4925130000 | -2.8346340000 |
| H | 2.6878830000  | -3.8021910000 | -1.6635200000 |
| H | 4.5744860000  | -0.2352420000 | 1.7376220000  |
| H | 3.2451230000  | 0.6307140000  | 2.6028630000  |
| H | 3.5609290000  | -1.1142330000 | 2.8750840000  |
| H | 2.0767900000  | 4.0887910000  | -1.6427010000 |
| H | 2.2554820000  | 2.5051590000  | -2.4931410000 |
| H | 0.8699520000  | 3.5963080000  | -2.8249710000 |
| H | -0.8625720000 | 3.5975110000  | 2.8249480000  |
| H | -2.0679730000 | 4.0934080000  | 1.6426100000  |
| H | -2.2507400000 | 2.5099530000  | 2.4925260000  |
| H | -2.6946560000 | -3.7968700000 | 1.6637780000  |

|   |               |               |               |
|---|---------------|---------------|---------------|
| H | -1.1979130000 | -3.2242020000 | 2.4995370000  |
| H | -2.7975910000 | -2.4867980000 | 2.8346580000  |
| H | -3.5633390000 | -1.1079220000 | -2.8749970000 |
| H | -4.5752410000 | -0.2266600000 | -1.7378190000 |
| H | -3.2441660000 | 0.6364770000  | -2.6032320000 |

**Table S5.** Cartesian coordinates for nitroacetylacetone

|   |               |               |               |
|---|---------------|---------------|---------------|
| O | -1.2207600000 | 1.9793900000  | 0.0610100000  |
| O | 1.2212100000  | 1.9741500000  | -0.0298400000 |
| C | 0.0010900000  | -0.0089500000 | -0.0015100000 |
| C | -1.2171700000 | 0.6805100000  | 0.0358800000  |
| C | 1.2576400000  | 0.7304400000  | -0.0399300000 |
| C | -2.5750000000 | 0.0818400000  | 0.0810000000  |
| C | 2.5939700000  | 0.0704500000  | -0.1351500000 |
| H | -2.8278800000 | -0.3473800000 | -0.8990900000 |
| H | -2.6346000000 | -0.7485200000 | 0.7959000000  |
| H | -3.2905300000 | 0.8730200000  | 0.3371300000  |
| H | 3.3302800000  | 0.8455900000  | -0.3809700000 |
| H | 2.8508400000  | -0.3991200000 | 0.8251500000  |
| H | 2.6074100000  | -0.7372800000 | -0.8792600000 |
| N | -0.0060800000 | -1.4571400000 | 0.0077900000  |
| H | -0.2338500000 | 2.2697100000  | 0.0284700000  |
| O | 0.9828800000  | -2.0290200000 | 0.4360400000  |
| O | -0.9986100000 | -2.0347500000 | -0.4076600000 |
